# Supplementary material for: Association Between Single-Nucleotide Polymorphisms of NKX2.5 and Congenital Heart Disease in Chinese Population: A Meta-Analysis
Source: Research Square preprint supplement (doi:10.21203/rs.3.rs-923282/v1), 2021-10-12
Supplement: Supplementary file 1 [file 16ef870e329cedb89352a100.docx]

*supplementary file*

These articles could not obtain complete Genotypes data

1.Wang, H., Y. Liu, Y. Li, W. Wang, L. Li, M. Meng, Y. Xie, Y. Zhang, Z. Yunfeng, S. Han, J. Zeng, Z. Hou, and L. Jiang. 2019. Analysis of NKX2-5 in 439 Chinese Patients with Sporadic Atrial Septal Defect. *Med Sci Monit* 25:2756-2763.

2.Zheng, J., F. Li, J. Liu, Z. Xu, H. Zhang, Q. Fu, J. Wang, and K. Sun. 2015. Investigation of Somatic NKX2-5 Mutations in Chinese Children with Congenital Heart Disease. *Int J Med Sci* 12 (7):538-543.

3.Xiong, F., Q. Li, C. Zhang, Y. Chen, P. Li, X. Wei, Q. Li, W. Zhou, L. Li, X. Shang, and X. Xu. 2013. Analyses of GATA4, NKX2.5, and TFAP2B genes in subjects from southern China with sporadic congenital heart disease. *Cardiovasc Pathol* 22 (2):141-145.

4.Wang, J., Y. Lu, H. Chen, M. Yin, T. Yu, and Q. Fu. 2011. Investigation of somatic NKX2-5, GATA4 and HAND1 mutations in patients with tetralogy of Fallot. *Pathology* 43 (4):322-326.

5.Peng, T., L. Wang, S. F. Zhou, and X. Li. 2010. Mutations of the GATA4 and NKX2.5 genes in Chinese pediatric patients with non-familial congenital heart disease. *Genetica* 138 (11-12):1231-1240.

These articles have no 606G>C data

1.Pang, S., J. Shan, Y. Qiao, L. Ma, X. Qin, H. Wanyan, Q. Xing, G. Wu, and B. Yan. 2012. Genetic and functional analysis of the NKX2-5 gene promoter in patients with ventricular septal defects. *Pediatr Cardiol* 33 (8):1355-1361.

2.Ouyang, P., E. Saarel, Y. Bai, C. Luo, Q. Lv, Y. Xu, F. Wang, C. Fan, A. Younoszai, Q. Chen, X. Tu, and Q. K. Wang. 2011. A de novo mutation in NKX2.5 associated with atrial septal defects, ventricular noncompaction, syncope and sudden death. *Clin Chim Acta* 412 (1-2):170-175.

3.Liu, X. Y., Y. Q. Yang, Y. Yang, X. P. Lin, and Y. H. Chen. 2009. [Mutation of NKX2-5 gene in patients with atrial septal defect]. *Zhonghua Er Ke Za Zhi* 47 (9):696-700.

These articles were not CHD studies

1.Dritsoula A, Papaioannou I, Guerra SG, et al. Molecular Basis for Dysregulated Activation of NKX2-5 in the Vascular Remodeling of Systemic Sclerosis. Arthritis Rheumatol. 2018;70(6):920-931. doi:10.1002/art.40419

2.[Khatami M, Heidari MM, Tabesh F, Ordooei M, Salehifar Z. Mutation analysis of the NKX2.5 gene in Iranian pediatric patients with congenital hypothyroidism. J Pediatr Endocrinol Metab. 2017;30(8):857-862. doi:10.1515/jpem-2017-0084](https://pubmed.ncbi.nlm.nih.gov/28749785/)

3.10.[Benaglio P, D'Antonio-Chronowska A, Ma W, et al. Allele-specific NKX2-5 binding underlies multiple genetic associations with human electrocardiographic traits. Nat Genet. 2019;51(10):1506-1517. doi:10.1038/s41588-019-0499-3](https://pubmed.ncbi.nlm.nih.gov/31570892/)

4.[Hanley A, Walsh KA, Joyce C, et al. Mutation of a common amino acid in NKX2.5 results in dilated cardiomyopathy in two large families. BMC Med Genet. 2016;17(1):83. Published 2016 Nov 17. doi:10.1186/s12881-016-0347-6](https://pubmed.ncbi.nlm.nih.gov/27855642/)

5.[Feenstra B, Geller F, Krogh C, et al. Common variants near MBNL1 and NKX2-5 are associated with infantile hypertrophic pyloric stenosis. Nat Genet. 2012;44(3):334-337. Published 2012 Feb 5. doi:10.1038/ng.1067](https://pubmed.ncbi.nlm.nih.gov/22306654/)

The full electronic boolean search strategy in Pubmed

**(((((((Nucleotide Polymorphism, Single) OR (Nucleotide Polymorphisms, Single)) OR (Polymorphisms, Single Nucleotide)) OR (Single Nucleotide Polymorphisms)) OR (SNPs)) OR (Single Nucleotide Polymorphism)) ) AND (((((((((((((((Homeobox Protein Nkx 2.5) OR (Nkx-2.5, Homeobox Protein)) OR (NK2 Homeobox 5 Protein)) OR (Homeobox Transcription Factor Csx-Nkx2-5)) OR (Homeobox Transcription Factor Csx Nkx2 5)) OR (Homeobox Protein Csx-Nkx2.5)) OR (Csx-Nkx2.5, Homeobox Protein)) OR (Homeobox Protein Csx Nkx2.5)) OR (Cardiac-Specific Homeobox Protein)) OR (Cardiac Specific Homeobox Protein)) OR (Homeobox Protein, Cardiac-Specific)) OR (Transcription Factor Nkx-2.5)) OR (Nkx-2.5, Transcription Factor)) OR (Transcription Factor Nkx 2.5)))**

**NEWCASTLE - OTTAWA QUALITY ASSESSMENT SCALE**

**CASE CONTROL STUDIES**

Note: A study can be awarded a maximum of one star for each numbered item within the Selection and Exposure categories. A maximum of two stars can be given for Comparability.

**Selection**

1) Is the case definition adequate?

a) yes, with independent validation **¯**

b) yes, eg record linkage or based on self reports

c) no description

2) Representativeness of the cases

a) consecutive or obviously representative series of cases **¯**

b) potential for selection biases or not stated

3) Selection of Controls

a) community controls **¯**

b) hospital controls

c) no description

4) Definition of Controls

a) no history of disease (endpoint) **¯**

b) no description of source

**Comparability**

1) Comparability of cases and controls on the basis of the design or analysis

a) study controls for _______________(Select the most important factor.) **¯**

b) study controls for any additional factor **¯** (This criteria could be modified to indicate specific control for a second important factor.)

**Exposure**

1) Ascertainment of exposure

a) secure record (eg surgical records) **¯**

b) structured interview where blind to case/control status **¯**

c) interview not blinded to case/control status

d) written self report or medical record only

e) no description

2) Same method of ascertainment for cases and controls

a) yes **¯**

b) no

3) Non-Response rate

a) same rate for both groups **¯**

b) non respondents described

c) rate different and no designation

The results of the quality assessment for each individual study assessed

| *Author* | *Yin, J*  2019 | *Cao, Y*  *2016* | *Zhang, W*  *2016* | *Cao, Y*  *2015* | *Tang,J*  *2015* | *Zhao*  *2014* | *Zhang, W*  *2009* | *Liu, X. Y 2009* |
| --- | --- | --- | --- | --- | --- | --- | --- | --- |
| *HC* | 7 | 7 | 7 | 7 | 7 | 7 | 7 | 7 |
| *XW* | 7 | 7 | 7 | 7 | 7 | 7 | 7 | 7 |

Table of the scores showing the breakdown of points scored for each criteria

|  |  |  | Yin, J  2019 | Cao, Y  2016 | Zhang, W  2016 | Cao, Y  2015 | Tang,J  2015 | Zhao  2014 | Zhang, W  2009 | Liu, X. Y 2009 |
| --- | --- | --- | --- | --- | --- | --- | --- | --- | --- | --- |
| **Selection** | 1) | a) | **¯** | **¯** | **¯** | **¯** | **¯** | **¯** | **¯** | **¯** |
| b) |  |  |  |  |  |  |  |  |
| c) |  |  |  |  |  |  |  |  |
| 2) | a) | **¯** | **¯** | **¯** | **¯** | **¯** | **¯** | **¯** | **¯** |
| b) |  |  |  |  |  |  |  |  |
| 3) | a) | **¯** | **¯** | **¯** | **¯** | **¯** | **¯** | **¯** | **¯** |
| b) |  |  |  |  |  |  |  |  |
| c) |  |  |  |  |  |  |  |  |
| 4) | a) | **¯** | **¯** | **¯** | **¯** | **¯** | **¯** | **¯** | **¯** |
| b) |  |  |  |  |  |  |  |  |
| **Comparability** | 1) | a) | **¯** | **¯** | **¯** | **¯** | **¯** | **¯** | **¯** | **¯** |
| b) |  |  |  |  |  |  |  |  |
| **Exposure** | 1) | a) | **¯** | **¯** | **¯** | **¯** | **¯** | **¯** | **¯** | **¯** |
| b) |  |  |  |  |  |  |  |  |
| c) |  |  |  |  |  |  |  |  |
| d) |  |  |  |  |  |  |  |  |
| e) |  |  |  |  |  |  |  |  |
| 2) | a) | **¯** | **¯** | **¯** | **¯** | **¯** | **¯** | **¯** | **¯** |
| b) |  |  |  |  |  |  |  |  |
| 3) | a) |  |  |  |  |  |  |  |  |
| b) |  |  |  |  |  |  |  |  |
| c) |  |  |  |  |  |  |  |  |
